# Supplementary material
Source: publisher figshare collection journal article supplement (https://frontiersin.figshare.com/ndownloader/files/30601848)
Supplement: Supplementary file 1 [file 30601848]

**Supplemental Table S4.** Main effects and standard error (in log odds) for the final models for each functional group. Round coefficients are in reference to round one and cloudcover co-efficients are calculated in reference to overcast weather.

| Occupancy Variables | Ant | Beetle | Bumblebee | Butterfly | Honeybee | Hoverfly | Other Fly | Small Bee | Wasp |
| --- | --- | --- | --- | --- | --- | --- | --- | --- | --- |
| psi(Intercept) | 0.22 +/- 0.67 | 213.17 +/- 263 | 13.57 +/- 345 | 32 +/- 117 | 3.79 +/- 1.65 | 139.57 +/- 90.1 | 0.17 +/- 0.65 | 12.2 +/- 60.2 | 9.4 +/- 7.7 |
| psi(Any Fl Y) | NA | NA | NA | 62.48 +/- 273 | NA | NA | NA | NA | NA |
| psi(Formal Fl Y) | NA | NA | NA | NA | NA | NA | NA | NA | NA |
| psi(Grass Fl Y) | NA | NA | NA | NA | NA | NA | 5.71 +/- 11.7 | NA | NA |
| psi(Green Buffer) | NA | 144.95 +/- 180 | NA | 42.16 +/- 154 | -1.89 +/- 1.03 | NA | NA | NA | NA |
| psi(Log Area) | -0.67 +/- 0.43 | NA | NA | NA | NA | 56.89 +/- 38.1 | NA | NA | NA |
| psi(Shrub Volume) | NA | NA | NA | NA | NA | NA | NA | NA | 13.5 +/- 273 |
| psi(Tree Richness) | NA | NA | NA | NA | NA | NA | NA | NA | NA |
| psi(Unsealed Prop) | NA | NA | NA | NA | NA | 52.87 +/- 34.4 | NA | NA | 1.82 +/- 154 |
| Interaction Variables |  |  |  |  |  |  |  |  |  |
| p(Intercept) | -1.52 +/- 0.39 | -1.24 +/- 0.27 | -4.07 +/- 0.683 | -2.64 +/- 0.49 | -1.29 +/- 0.51 | -0.55 +/- 0.2 | -0.92 +/- 0.38 | 0.72 +/- 0.31 | -1.56 +/- 0.44 |
| p(Avg Wind) | NA | NA | NA | -0.25 +/- 0.21 | NA | NA | -0.17 +/- 0.15 | NA | NA |
| p(Cloudcover Partly) | NA | NA | 0.79 +/- 0.52 | NA | 0.9 +/- 0.44 | NA | NA | NA | 0.53 +/- 0.49 |
| p(Cloudcover Sun) | NA | NA | 1.53 +/- 0.53 | NA | 0.47 +/- 0.44 | NA | NA | NA | 1.32 +/- 0.49 |
| p(Flower Offer) | 0.6 +/- 0.24 | 0.39 +/- 0.2 | NA | -0.61 +/- 273 | NA | NA | NA | NA | NA |
| p(Flower Richness) | 0.31 +/- 0.2 | NA | 0.68 +/- 0.16 | NA | NA | 0.4 +/- 0.13 | NA | NA | NA |
| p(Hour) | NA | NA | NA | NA | NA | NA | NA | NA | 0.32 +/- 0.15 |
| p(Log Flower Abund) | NA | NA | NA | NA | 0.64 +/- 0.16 | NA | 0.28 +/- 0.17 | 0.37 +/- 0.17 | NA |
| p(Person Kb) | NA | NA | NA | 0.51 +/- 0.42 | NA | 0.91 +/- 0.26 | NA | -0.37 +/- 0.29 | NA |
| p(Placement Unsealed) | NA | NA | 0.64 +/- 0.35 | NA | 0.96 +/- 0.34 | NA | 0.97 +/- 0.39 | 0.82 +/- 0.34 | NA |
| p(Round 2) | NA | -3.01 +/- 1.1 | 1.73 +/- 0.45 | 0.68 +/- 0.49 | -0.59 +/- 0.35 | NA | -0.65 +/- 0.33 | NA | NA |
| p(Round 3) | NA | -3.31 +/- 1 | 2.31 +/- 0.43 | -0.56 +/- 0.6 | -0.62 +/- 0.33 | NA | -0.55 +/- 0.33 | NA | NA |
| p(Temp) | NA | NA | -0.31 +/- 0.16 | NA | NA | -0.36 +/- 0.13 | NA | 0.83 +/- 0.15 | NA |
